# Supplementary material
Source: Springer Nature journal article supplement (https://www.springermedizin.de/resource/supplementary/12885_2008_1532_MOESM9_ESM.pdf/9472252)

# Additional file 9.

**a**

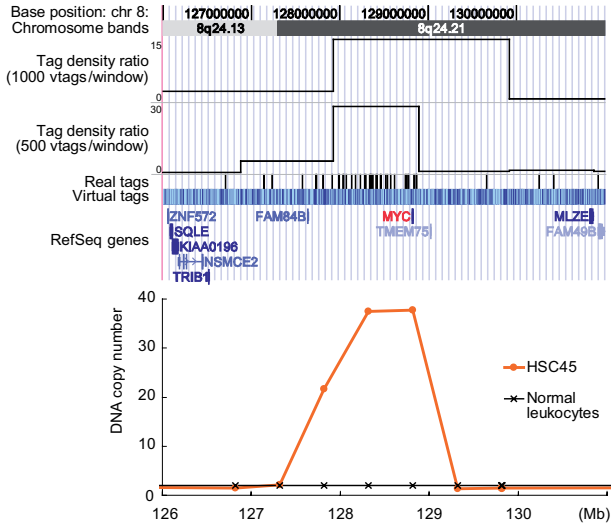

**b**

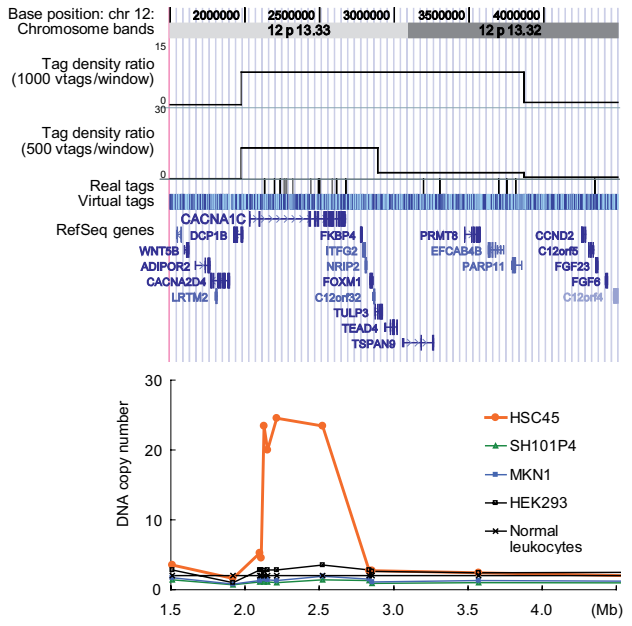

**c**

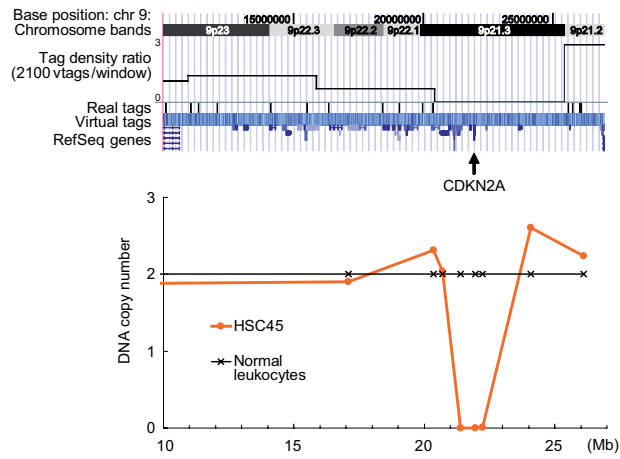

**d**

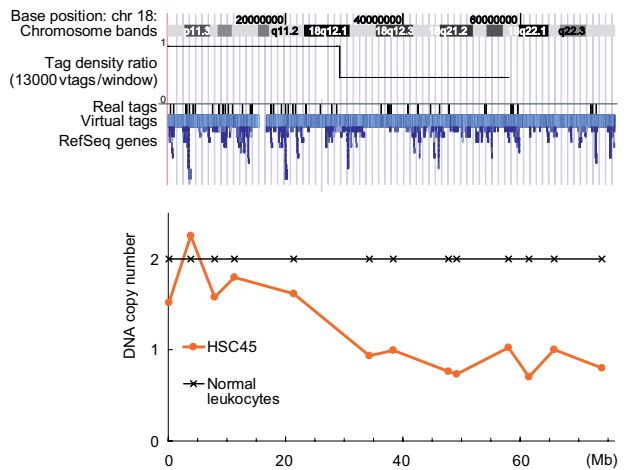

**e**

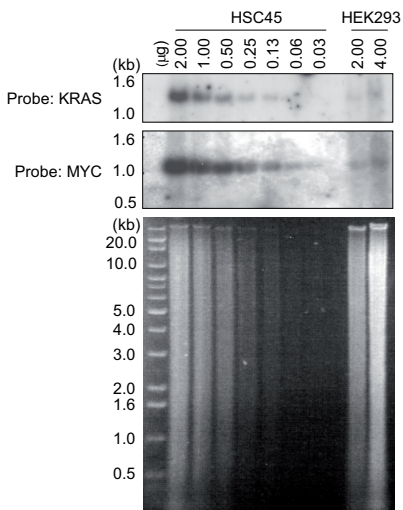

Supplement: MOESM9 [file 9472252]
